# Supplementary material for: Role of copolymerized photosensitizer in hydrogen-generating gel systems for higher quantum efficiency
Source: Royal Society of Chemistry journal article supplement (doi:10.1039/c0cc04346j), 2010-11-19
Supplement: c0cc04346j.pdf [file c0cc04346j.pdf]

## **Supplementary Information**

### **Role of Copolymerized Photosensitizer in Hydrogen-Generating Gel Systems for Higher Quantum Efficiency**

**Kosuke Okeyoshi and Ryo Yoshida\***

Department of Materials Engineering, Graduate School of Engineering, The University of Tokyo

7-3-1 Hongo, Bunkyo-ku, Tokyo 113-8656, Japan

TEL & FAX: +81 (0)3 5841 7112. E-mail: ryo@cross.t.u-tokyo.ac.jp

\*To whom correspondence should be addressed.

## **(S1) Experimental details.**

**Materials.** *N*-isopropylacrylamide (NIPAAm; Wako Pure Chemical Industries, Co., Ltd., Osaka, Japan) was purified by recrystallization from its toluene solution with hexane. Ruthenium(4-vinyl-4-methyl-2,2'-bipyridine)bis(2,2'-bipyridine)bis(chloride) (Ru(bpy)<sub>3</sub> monomer) was synthesized according to previous work.<sup>[1]</sup> Other reagents were used without further purification.

**Preparation of Gels.** Firstly, surfactant-modified Pt nanoparticles were prepared by the alcohol reduction method with chloroplatinic acid (H<sub>2</sub>PtCl<sub>6</sub>·6H<sub>2</sub>O) (Wako Pure Chemical Industries, Co., Ltd., JAPAN) (34 mg), anionic surfactant (S180A) (Kao Co., JAPAN) (380 mg)<sup>[2]</sup> as a protector and ethanol-water mixed solvent (30 mL / 30 mL). After centrifugation, the colloidal solution was concentrated and dispersed in water (6.0 mL). The diameter of the S180A-Pt nanoparticles was measured to be about 2-3 nm from transmission electron microscopy (TEM). Secondly, NIPAAm (414 mg), Ru(bpy)<sub>3</sub> monomer (86 mg), *N,N'*-methylenebisacrylamide as a cross-linker (12 mg), Pt-colloidal solution (100 μL), and *N,N,N',N'*-tetramethylenediamine (100 μL) as an accelerator were dissolved in ultrapure-water (10 mL). After this pre-gel solution was soaked in ice water in a nitrogen atmosphere for 30 min, ammonium persulfate (10 mg) as an initiator was mixed, and microgels were prepared by suspension polymerization using liquid paraffin as an oil phase at 4 °C over 6 hours. After gelation, they were thoroughly washed to remove unreacted compounds. The introduced Ru(bpy)<sub>3</sub><sup>2+</sup> in the gel was calculated by the absorption strength for the microgel suspension (1.4 mol%). The overall concentrations of copolymerized Ru(bpy)<sub>3</sub><sup>2+</sup>, [Ru(bpy)<sub>3</sub><sup>2+</sup>]<sub>overall</sub> in the suspension were determined by the UV-vis measurements. The diameters of the poly(NIPAAm-*co*-Ru(bpy)<sub>3</sub>) microgels containing Pt nanoparticles in the swollen state just below the volume phase transition temperature (30 °C) in water were measured to be about 10 - 50 μm from optical microscopy observation.

**Fluorescence Measurements.** The microgel particles were observed by a fluorescence microscope (DFC360 FX, LEICA) equipped with a mercury lamp (ebq100, ISOLATED) and fluorescence imaging system (AF6000E, LEICA). A filter cube suitable for Ru(bpy)<sub>3</sub><sup>2+</sup> was used with the wavelength of excitation at 460 nm and emission at 600 nm. The fluorescence spectra were measured with a

spectrofluorometer (HITACHI, F-2500) with stirring at 30 °C. The wavelength of excitation was 460 nm.

**Preparation of the gel systems for visible light irradiation.** The poly(NIPAAm-*co*-Ru(bpy)<sub>3</sub>) microgels containing Pt nanoparticles were soaked in the mixture of methylviologen (MV<sup>2+</sup>) / ethylenediaminetetra acetic acid (EDTA). The microgel suspensions in the reaction cell (width: 10 mm, depth: 10 mm, height: *ca.* 50 mm) were stirred sufficiently in the dark for 1 day. After mixing, one side of the cell was irradiated by using a 500 W xenon lamp (UXL-500SX, USHIO) through an optical filter (460 ± 10 nm, ASAHI-BUNKO) and a window (10 mm × 20 mm). The input power was 7.0 mW. During the visible light irradiation, the microgel suspensions were stirred sufficiently at 30 °C. In anticipation of the complete system generating both hydrogen and oxygen, we carried out the visible light irradiation in a closed cell under an air atmosphere. At given times, the generated gas was collected and analyzed by gas chromatography (GC-8APT, SHIMADZU). The overall quantum efficiency of the H<sub>2</sub> generation was defined by the following equation:

$$\Phi_{\text{H}_2} = \frac{\text{number of electrons for the H}_2 \text{ generation}}{\text{number of the absorbed photons}}.$$

The number of electrons for H<sub>2</sub> generation is two times the amount of the generated H<sub>2</sub> molecules. The number of the absorbed photons was measured by a power meter (UIT-250, USHIO).

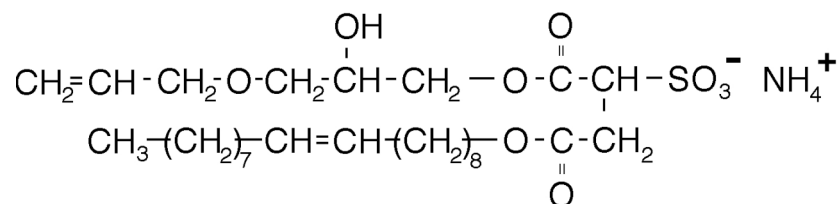

**Figure S1** Chemical structure of the anionic surfactant: S180A.

**(S2) Calculation for the local concentration of  $\text{Ru}(\text{bpy})_3^{2+}$  in gel.**

$$[\text{Ru}(\text{bpy})_3^{2+}]_{\text{local}} = [\text{Ru}(\text{bpy})_3^{2+}]_{\text{overall}} \times \frac{V_{\text{overall}}}{V_{\text{microgels}}} \quad (1)$$

$$[\text{Ru}(\text{bpy})_3^{2+}]_{\text{local}, 30^\circ\text{C}} = \frac{[\text{Ru}(\text{bpy})_3^{2+}]_{\text{local}, 20^\circ\text{C}}}{\frac{V_{30^\circ\text{C}}}{V_{20^\circ\text{C}}}} \quad (2)$$

$$V_{\text{microgels}} = \frac{W_{\text{microgel}}}{W_{\text{bulk}}} \times V_{\text{bulk}} \quad (3)$$

$[\text{Ru}(\text{bpy})_3^{2+}]_{\text{overall}}$ : Concentration of  $\text{Ru}(\text{bpy})_3^{2+}$  in the overall phase (the gel phase and the outer solution phase), determined by UV-vis measurements.

$[\text{Ru}(\text{bpy})_3^{2+}]_{\text{local}}$ : Concentration of  $\text{Ru}(\text{bpy})_3^{2+}$  in the gel phase.

V: Volume of gel, determined by the swelling measurements.

W: Weight of gel.

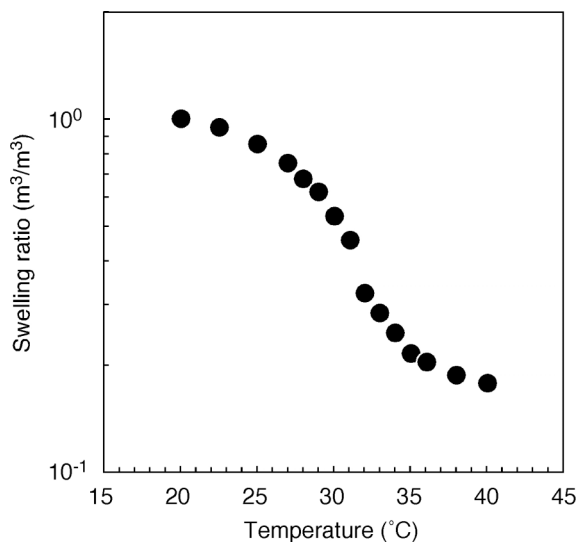

**Figure S2** The equilibrium swelling ratio of the Pt nanoparticles-immobilized poly(NIPAAm-co-Ru(bpy)<sub>3</sub>) gel in a mixture of  $[\text{EDTA}]_0 = 50 \text{ mM}$ .

**(S3) The duration time for the H<sub>2</sub> generation.**

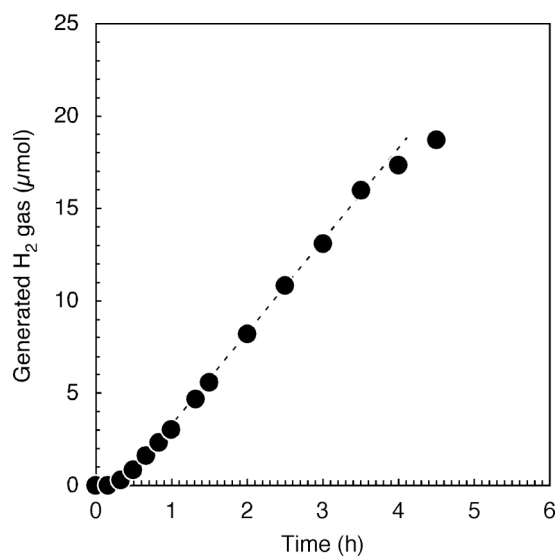

**Figure S3** H<sub>2</sub> generation for the gel system and light irradiation at 30 °C. Total volume of the mixture: 3.0 mL. The microgel suspension was adjusted as [Ru(bpy)<sub>3</sub><sup>2+</sup>] = 5.0 × 10<sup>-1</sup> mM. Outer solution ([EDTA]<sub>0</sub> = 50 mM; [MV<sup>2+</sup>]<sub>0</sub> = 5.0 mM).

**References**

- [1] (a) P. K. Gosh, T. G. Spiro, *J. Am. Chem. Soc.* 1980, **102**, 5543; (b) C. E. Williams, R. B. Lowry, J. B. Simon, T. Belt, *Inorg. Chim. Acta* 2001, **315**, 112.
- [2] (a) Y. Noguchi, K. Okeyoshi, R. Yoshida, *Macromol. Rapid Commun.* 2005, **26**, 1913; (b) K. Okeyoshi, T. Abe, Y. Noguchi, H. Furukawa, R. Yoshida, *Macromol. Rapid Commun.* 2008, **29**, 897.
